# Supplementary material for: Identification and genomic analysis of a novel temperate bacteriophage infecting Labrenzia aggregata isolated from the Mariana Trench
Source: Frontiers journal article supplement (doi:10.3389/fmars.2024.1375684), 2024-03-26
Supplement: Table_1.XLSX [file Table_1.XLSX]

## Sheet: Table S1
Table S1 Host range and chloroform sensitivity of vB_LagS-V1
Bacterial strains	Host range	Chloroform treatment
Labrenzia aggregata RF14	+	+
Labrenzia aggregata LZB033	-	-
Labrenzia aggregata SDL044	-	-
Labrenzia aggregata ZYF703	-	-
Labrenzia aggregata ZYF612	-	-
“+” and “-” represent “with phage plaques” and “without phage plaques” respectively.

## Sheet: Table S2
Table S2 The annotation of vB_LagS-V1
ORF	Strand	Position(bp)		Size (aa)	Annotation	Assigned phage*	E-value*	Accession No.*
		From	To
1	+	3	1757	585	terminase large subunit	Pseudanabaena phage Pan4	0	UXO93988.1
2	+	1757	3007	417	capsid portal protein	Rhizobium phage RHph_TM3_3_14B	9e-169	QIG68719.1
3	+	2991	3593	201	prohead protease protein	Rhizobium phage RHph_TM3_3_14B	1e-63	QIG68720.1
4	+	3644	4918	425	major capsid protein	Rhizobium phage RHph_Y3_1	2e-174	QIG68366.1
5	+	4957	5322	122	unknown	-	-	-
6	+	5322	5882	187	putative head-tail-connector protein	Rhizobium phage RHph_TM3_3_14B	1e-35	QIG68723.1
7	+	5882	6226	115	head-tail joining protein	Rhizobium phage RHph_Y3_1	2e-19	QIG68371.1
8	+	6226	6696	157	putative HK97 family phage protein	Pseudo-nitzschia multiseries DNA virus	1e-25	AYJ09388.1
9	+	6693	7103	137	tail terminator	Rhizobium phage 16-3	6e-34	YP_002117571.1
10	+	7168	7623	152	major tail protein	Brucella phage BiPBO1	8e-53	YP_009304041.1
11	+	7623	7994	124	tail tube protein	Brucella phage BiPBO1	2e-32	YP_009304042.1
12	+	7991	8164	58	unknown	-	-	-
13	+	8165	10354	730	tail tape measure protein	Rhizobium phage RHph_TM3_3_14B	2e-122	QIG68733.1
14	+	10351	11043	231	hypothetical protein	Rhizobium phage RHph_X2_24	3e-15	QWY83146.1
15	+	11027	11683	219	hypothetical protein	Rhizobium phage RHph_X2_24	1e-13	QWY83145.1
16	+	11622	12113	164	hypothetical protein	Rhizobium phage RHph_X2_24	2e-08	QWY83144.1
17	+	12110	14377	756	unknown	-	-	-
18	-	14622	15233	204	unknown	-	-	-
19	+	15417	16760	448	unknown	-	-	-
20	+	17072	17824	251	putative endolysin	Prokaryotic dsDNA virus sp.	8e-36	QDP64898.1
21	+	18194	18478	95	unknown	-	-	-
22	+	18478	18864	129	hypothetical protein	Sinorhizobium phage ort11	4e-08	YP_009884377.1
23	+	18861	19013	51	unknown	-	-	-
24	-	19478	19756	93	unknown	-	-	-
25	-	19796	20146	117	unknown	-	-	-
26	-	20149	21435	429	unknown	-	-	-
27	-	21691	21864	58	hypothetical protein	Vibrio phage phiV208	3e-24	QIW88946.1
28	-	21861	22088	76	unknown	-	-	-
29	+	22145	22390	82	unknown	-	-	-
30	-	22423	22713	97	unknown	-	-	-
31	-	22697	23287	197	unknown	-	-	-
32	-	23292	24068	259	phosphoadenosine phosphosulfate reductase	Caudoviricetes sp.	5e-71	DAU76039.1
33	+	24219	24929	237	unknown	-	-	-
34	-	24793	25371	193	unknown	-	-	-
35	-	25368	25601	78	unknown	-	-	-
36	-	25629	26111	161	Repressor protein CI	Caudoviricetes sp.	2e-09	DAG80598.1
37	+	26137	26394	86	transcriptional repressor	Salmonella phage SEN34	2e-08	YP_009191650.1
38	+	26391	26873	161	unknown	-	-	-
39	-	26876	27493	206	type VI secretion protein	Caudoviricetes sp.	3e-24	DAL13507.1
40	+	27565	27801	79	unknown	-	-	-
41	+	27798	28412	205	unknown	-	-	-
42	+	28403	28789	129	unknown	-	-	-
43	+	28789	29391	201	DNA polymerase A domain-containing protein	Sinorhizobium phage phi3LM21	6e-09	ATE84709.1
44	+	29388	29840	151	cysteine dioxygenase	Caulobacter phage Cr30	4e-36	YP_009098886.1
45	+	29837	30133	99	unknown	-	-	-
46	+	30126	30758	211	putative DNA methyltransferase protein	Rhizobium phage RHph_N3_2	2e-33	QIG72979.1
47	+	30762	30995	78	unknown	-	-	-
48	+	31032	31403	124	hypothetical protein	Aurantimonas phage AmM-1	1e-12	YP_009146989.1
49	+	31447	32373	309	DUF2303 family protein	Rhizobium phage RR1-A	5e-78	YP_008130190.1
50	+	32437	32736	100	unknown	-	-	-
51	+	32726	33763	346	Gp37/Gp68 family protein	Rhodobacter phage RcapNL	4e-103	YP_007518418.1
52	+	33760	34209	150	ACSH domain containing protein	Sinorhizobium phage phi3LM21	3e-36	ATE84691.1
53	+	34209	34568	120	DUF4031 domain-containing protein	Ralstonia phage Raharianne	2e-23	YP_010078139.1
54	+	34568	35263	232	putative DNA (cytosine-5) methyltransferases	Prokaryotic dsDNA virus sp.	4e-87	QDP58388.1
55	+	35260	36129	290	putative DNA adenine methylase	Prokaryotic dsDNA virus sp.	1e-105	QDP57358.1
56	+	36126	36452	109	unknown	-	-	-
57	+	36449	37699	417	helix-turn-helix DNA binding domain protein	Rhodobacter phage RcKemmy	3e-34	QXN71664.1
58	+	37696	38283	196	unknown	-	-	-
59	+	38482	38790	103	HNHc domain containing protein	uncultured Caudovirales phage	7e-10	CAB4167445.1
60	+	38853	39329	159	hypothetical protein	Bradyrhizobium phage ppBeUSDA76-1	4e-34	WAX24342.1
*: “-” represents not available.

## Sheet: Table S3
Table S3 The summary of bacteriophages isolated from deep-sea environments
Phage	Host	Isolation location	Lytic or temperate	Number of tRNA*	rRSCU*	accesion number of phage genome*	accesion number of host genome*
vB_LagS-V1	Labrenzia aggregata RF14	Mariana Trench 4000 m	temperate	None	0.933	PP058680	CP045617
MCV1	Marinitoga camini DV1197	Lucky strike hydrothermal vent 1700 m, Mid Atlantic Ridge	temperate	None	0.9806	KP836355	PRJNA229503
MCV2	Marinitoga camini DV1155	Black smoker chimney, Menez Gwen site, 840–870 m, Mid Atlantic Ridge	temperate	None	0.9689	KP836356	PRJNA229502
vB_ThpS-P1	Thiobacimonas profunda JLT2016	Southeastern Pacific Ocean deep-sea water 2571 m	temperate	None	0.9766	KT381864	PRJNA175613
vB_PeaS-P1	Pelagibaca abyssi JLT2014	Southeastern Pacific Ocean deep-sea water 2000 m	temperate	None	0.9513	KT381865	PRJNA315492
BVW1	Bacillus sp. W13	Pacific hydrothermal fields	lytic	–	–	–	–
GVE1	Geobacillus sp. E26323	Pacific hydrothermal fields	lytic	–	–	–	–
PAV1	Pyrococcus abyssi strain GE23	Southwest Pacific hydrothermal fluids 2000 m	temperate	None	–	NC_009597	–
MPV1	Marinitoga piezophila KA3	Hydrothermal vent chimney 2630 m,East-Pacific Rise	temperate	–	–	–	NC_016751
TPV1	Thermococcus prieurii	Deep-sea hydrothermal chimney 2700 m depth,East-Pacific Rise	temperate	None	–	NC_016899	–
D6E	Geobacillus sp. E263	Deep-sea hydrothermal field, East Pacific	temperate	None	0.5059	NC_019544	NZ_CP041632
GVE2	Geobacillus sp. E263	Deep-sea hydrothermal field, East Pacific	lytic	None	0.4883	NC_009552	NZ_CP041633
PstS-1	Pseudomonas stutzeri 1-1-1b	Japan trench 7000 m	temperate	None	–	–	–
AmM-1	Aurantimonas sp. C5-1	Bathypelagic water 1500 m in the Northwest Pacific	temperate	None	–	NC_027334	–
NrS-1	Nitratiruptor sp. SB155-2	Iheya North hydrothermal field, Japan	temperate	None	0.6543	AB746912	NC_009662
vB_HmeY_H4907	Halomonas sp. H4907	Mariana Trench 8900 m	temperate	None	–	OQ832096	–
*: “-” represents not available.
